# Supplementary material for: Gastrointestinal stromal tumor: 15-years’ experience in a single center
Source: PubMed Central journal article supplement (PMC4254179; doi:10.1186/1471-2482-14-93), 2014-11-18
Supplement: 12893_2014_534_MOESM1_ESM.pdf [file 12893_2014_534_MOESM1_ESM.pdf]

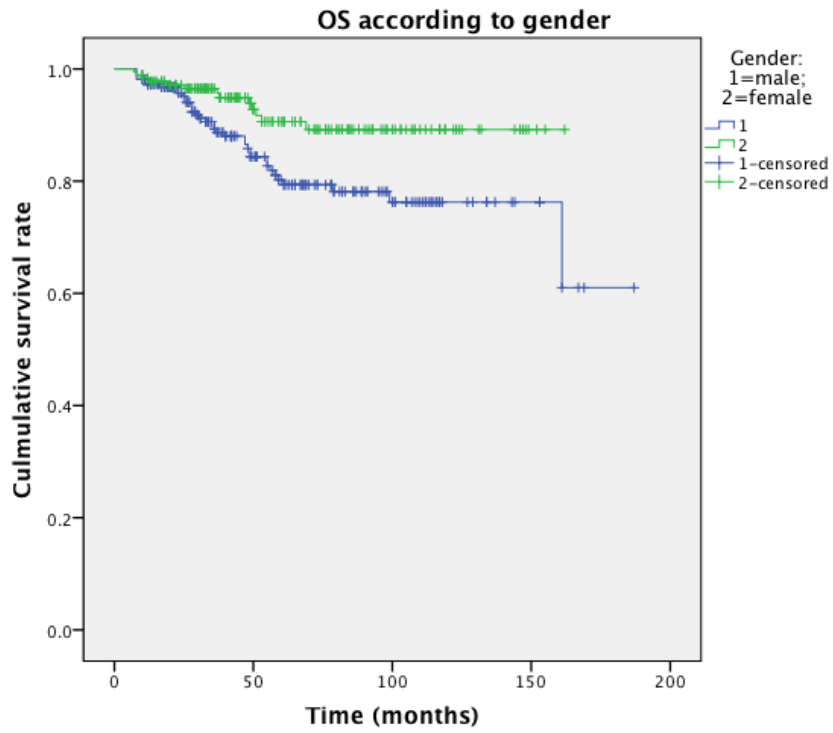

**a**

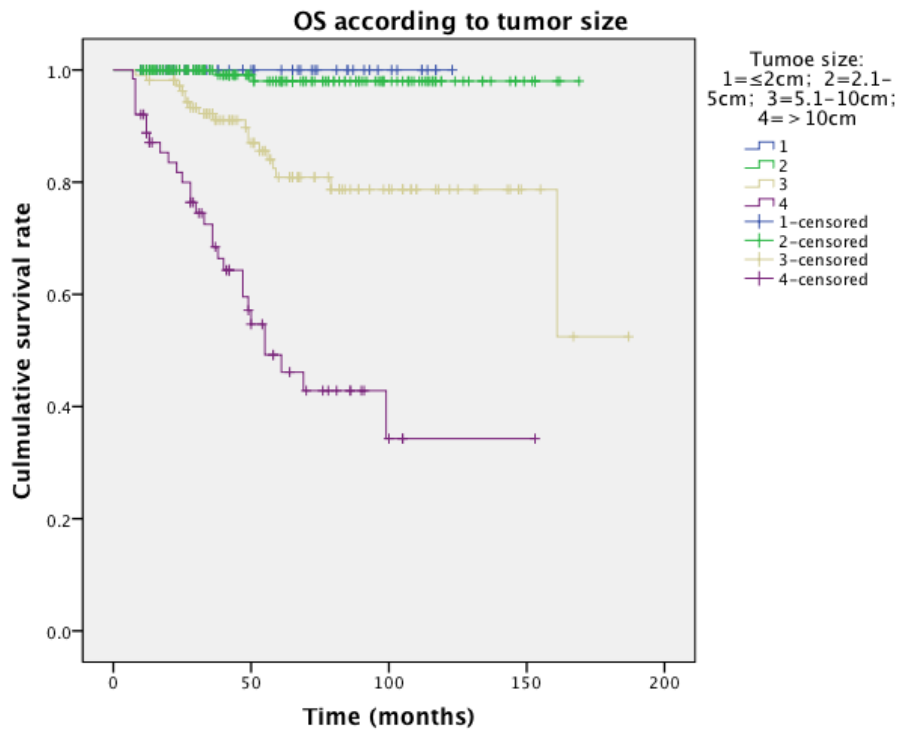

**b**

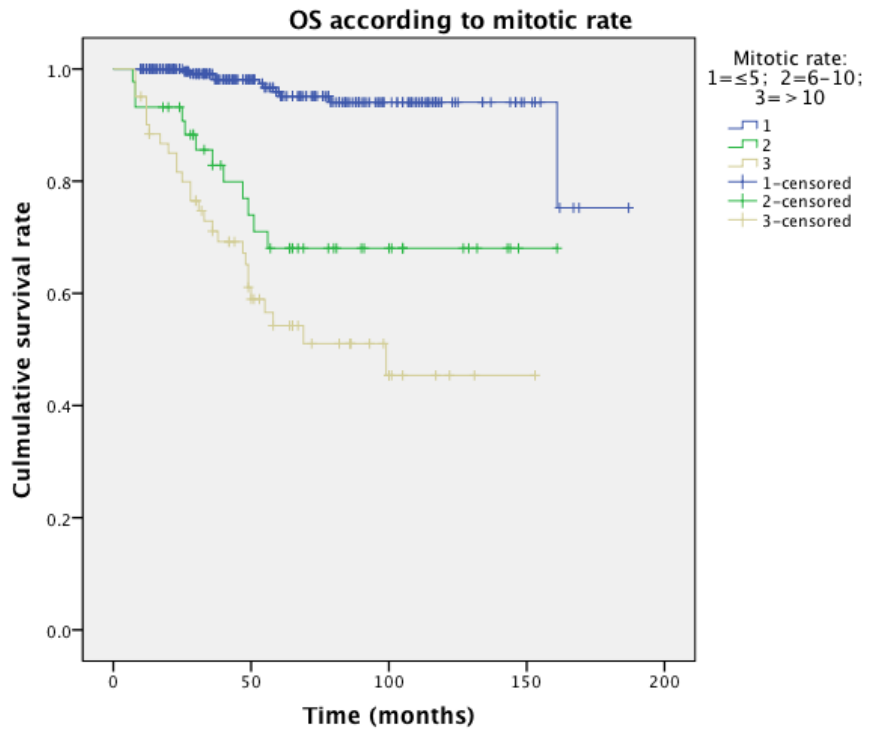

**c**

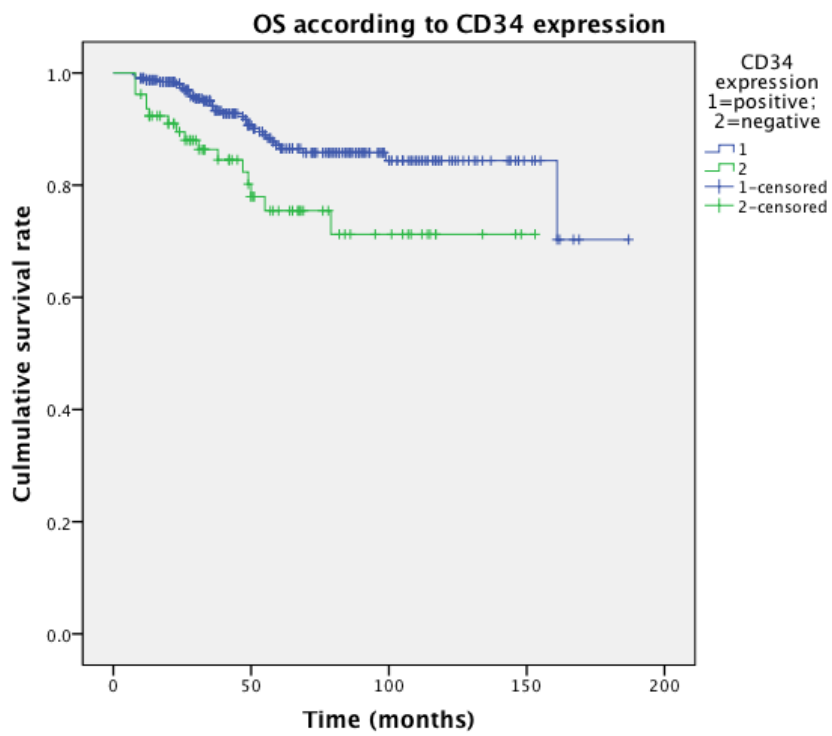

**d**

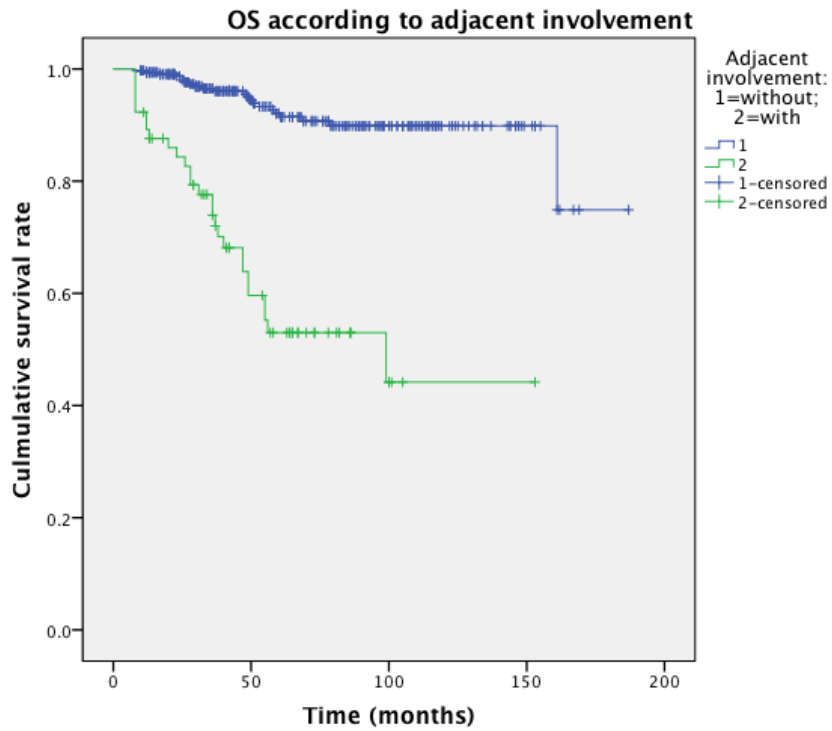

e

**Additional file 1. Univariate analysis of overall survival in 401 GIST patients (a: gender; b: tumor size; c: mitotic rate; d: CD34 expression; e: adjacent involvement)**
