# Supplementary material for: Gastrointestinal stromal tumor: 15-years’ experience in a single center
Source: PubMed Central journal article supplement (PMC4254179; doi:10.1186/1471-2482-14-93), 2014-11-18
Supplement: 12893_2014_534_MOESM2_ESM.pdf [file 12893_2014_534_MOESM2_ESM.pdf]

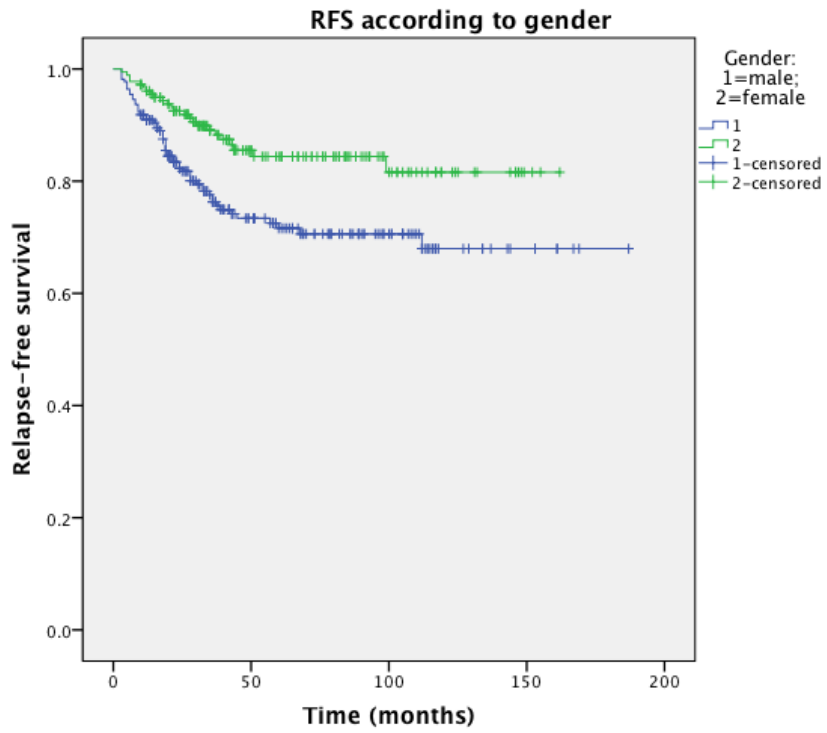

**a**

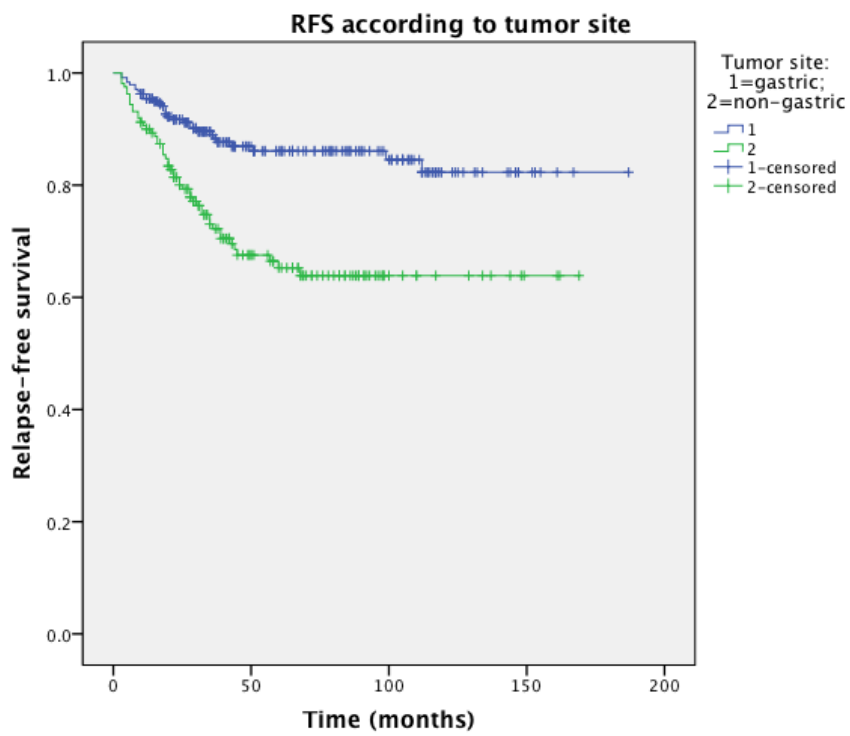

**b**

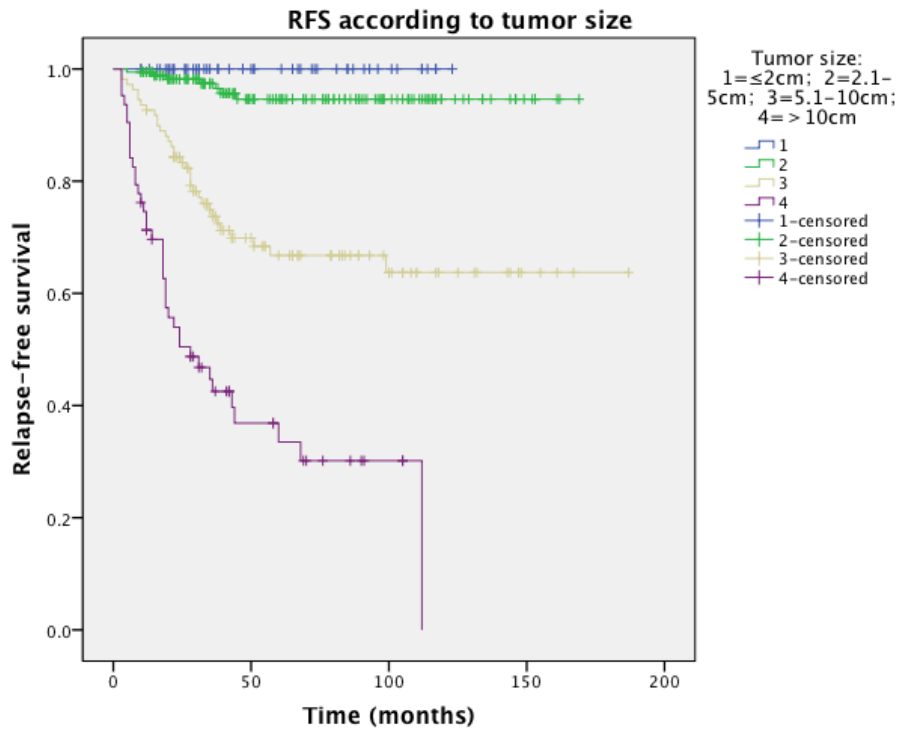

**c**

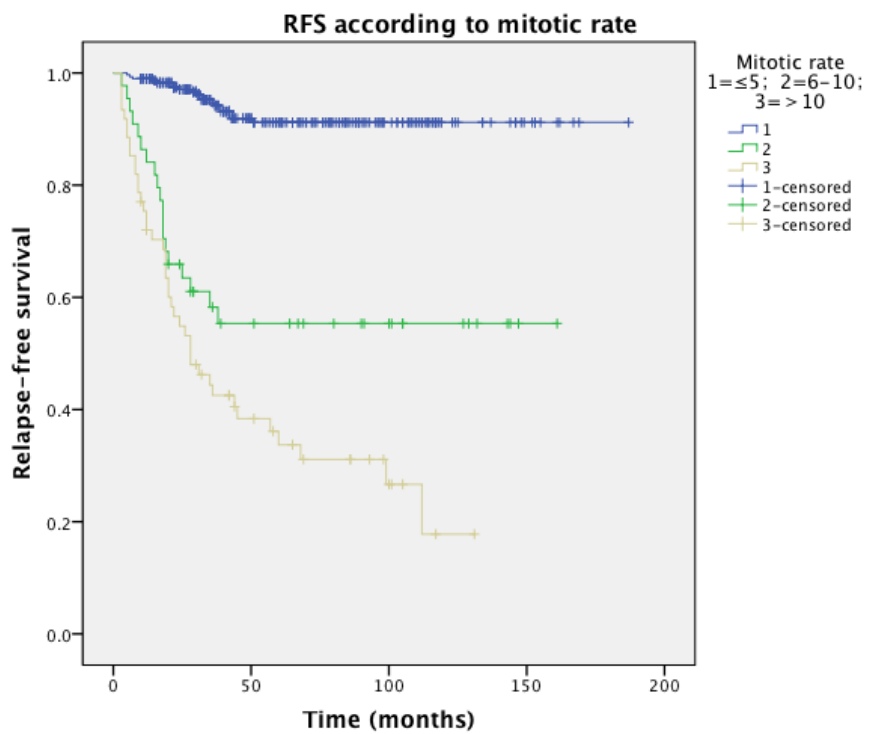

**d**

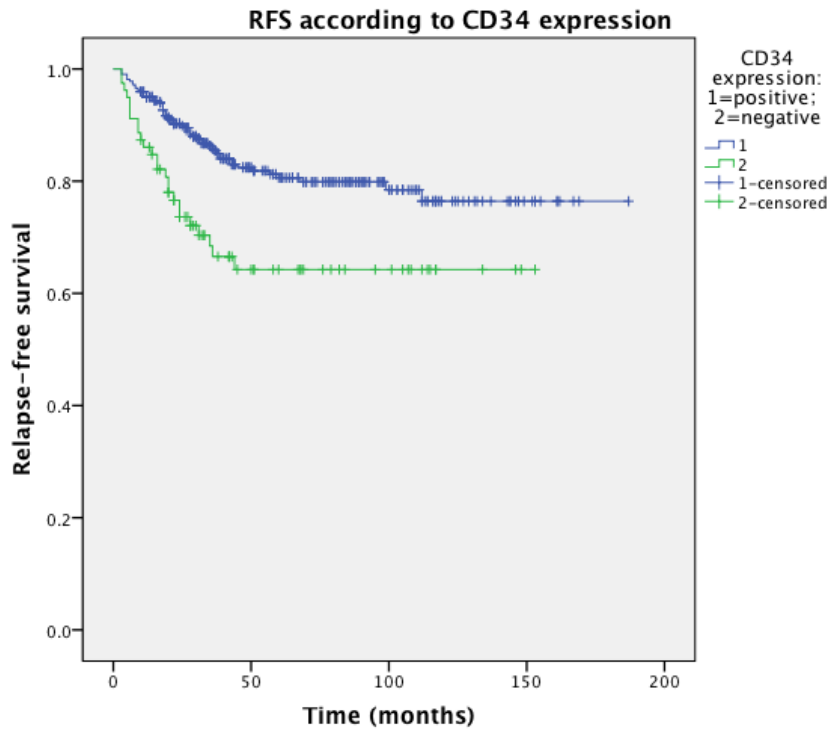

e

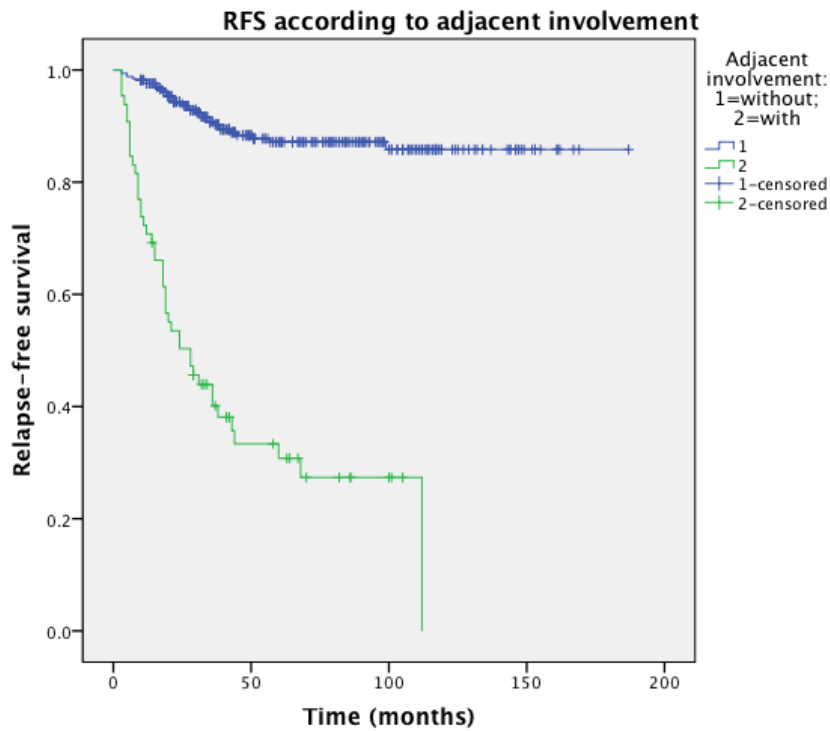

f

**Additional file 2. Univariate analysis of relapse-free survival in 401 GIST patients (a: sex; tumor site; c: tumor size; d: mitotic rate; e: CD34 expression; f: adjacent involvement)**
