# Supplementary material for: Gastrointestinal stromal tumor: 15-years’ experience in a single center
Source: PubMed Central journal article supplement (PMC4254179; doi:10.1186/1471-2482-14-93), 2014-11-18
Supplement: 12893_2014_534_MOESM3_ESM.pdf [file 12893_2014_534_MOESM3_ESM.pdf]

**Additional file 3. Clinicopathological characteristics of 275 intermediate-high risk GIST patients according to whether received post-operation IM adjuvant therapy**

| Feature              | Group             | N   | Non-adjuvant | Adjuvant | $\chi^2$ | P-value |
|----------------------|-------------------|-----|--------------|----------|----------|---------|
| Gender               | Male              | 170 | 121          | 49       | 1.629    | 0.230   |
|                      | Female            | 105 | 67           | 38       |          |         |
| Age                  | ≤60               | 129 | 88           | 41       | 0.002    | 1.000   |
|                      | >60               | 146 | 100          | 46       |          |         |
| Site                 | Gastric           | 143 | 93           | 50       | 1.526    | 0.244   |
|                      | Non-gastric       | 132 | 95           | 37       |          |         |
| Size                 | ≤2cm              | 1   | 1            | 0        | 1.972    | 0.578   |
|                      | 2.1-5cm           | 24  | 19           | 5        |          |         |
|                      | 5.1-10cm          | 159 | 106          | 53       |          |         |
|                      | >10cm             | 91  | 62           | 29       |          |         |
| Mitotic rate         | <5/50HPF          | 131 | 85           | 46       | 1.452    | 0.484   |
|                      | 5~10/50HPF        | 61  | 43           | 18       |          |         |
|                      | >10/50HPF         | 83  | 60           | 23       |          |         |
| Risk class           | Intermediate risk | 79  | 51           | 28       | 0.743    | 0.394   |
|                      | High risk         | 196 | 137          | 59       |          |         |
| CD117 expression     | Positive          | 242 | 166          | 76       | 0.050    | 0.843   |
|                      | Negative          | 33  | 22           | 11       |          |         |
| CD34 expression      | Positive          | 213 | 143          | 70       | 0.658    | 0.443   |
|                      | Negative          | 62  | 45           | 17       |          |         |
| Adjacent involvement | Without           | 184 | 126          | 58       | 0.003    | 1.000   |
|                      | With              | 91  | 62           | 29       |          |         |
